# Supplementary material for: The DACH1 gene is frequently deleted in prostate cancer, restrains prostatic intraepithelial neoplasia, decreases DNA damage repair, and predicts therapy responses
Source: PubMed Central journal article supplement (PMC10238272; doi:10.1038/s41388-023-02668-9), 2023-04-24

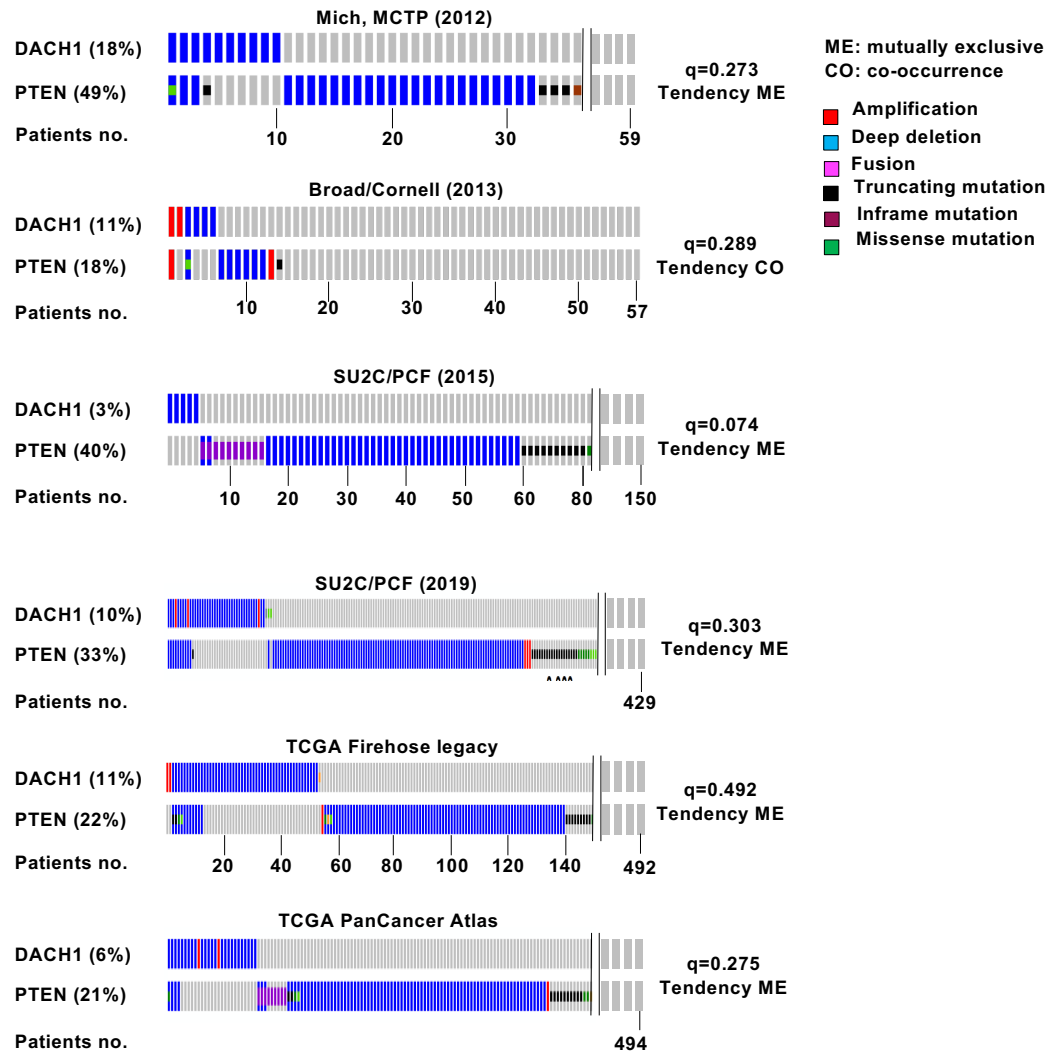

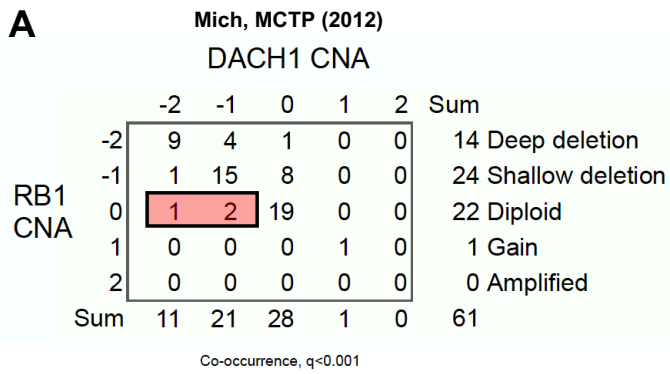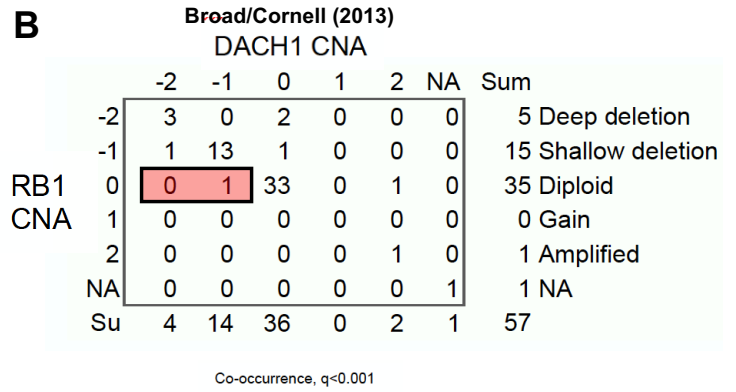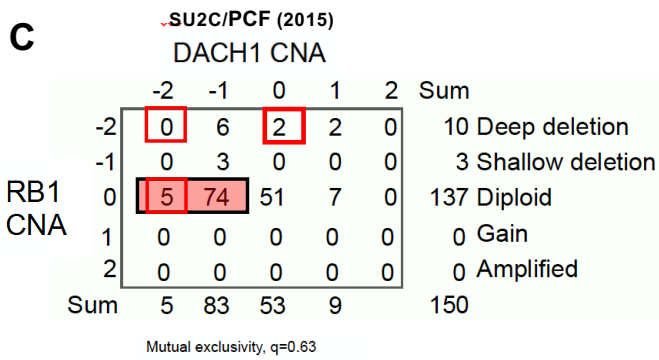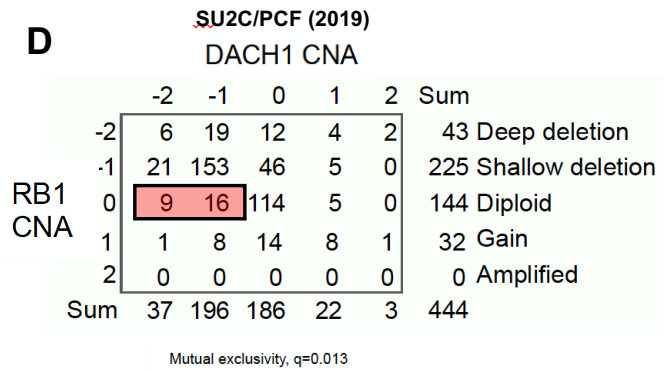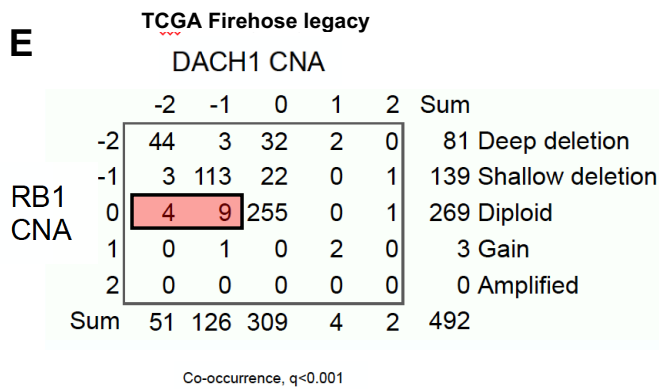

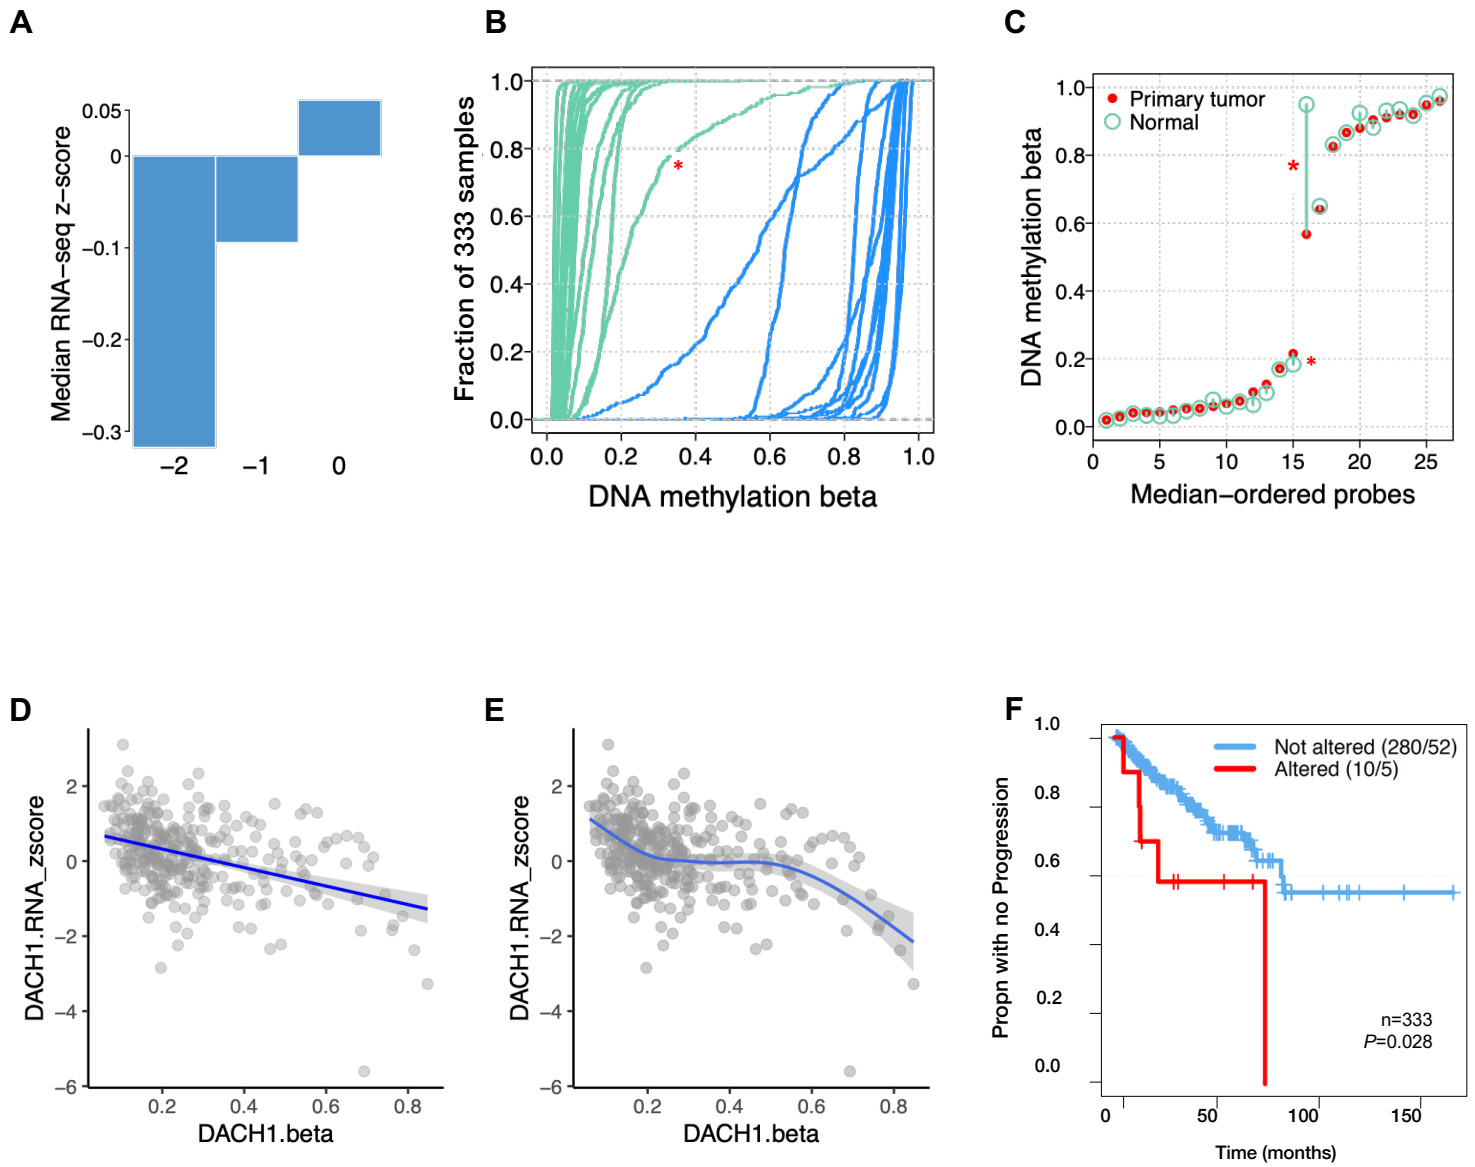

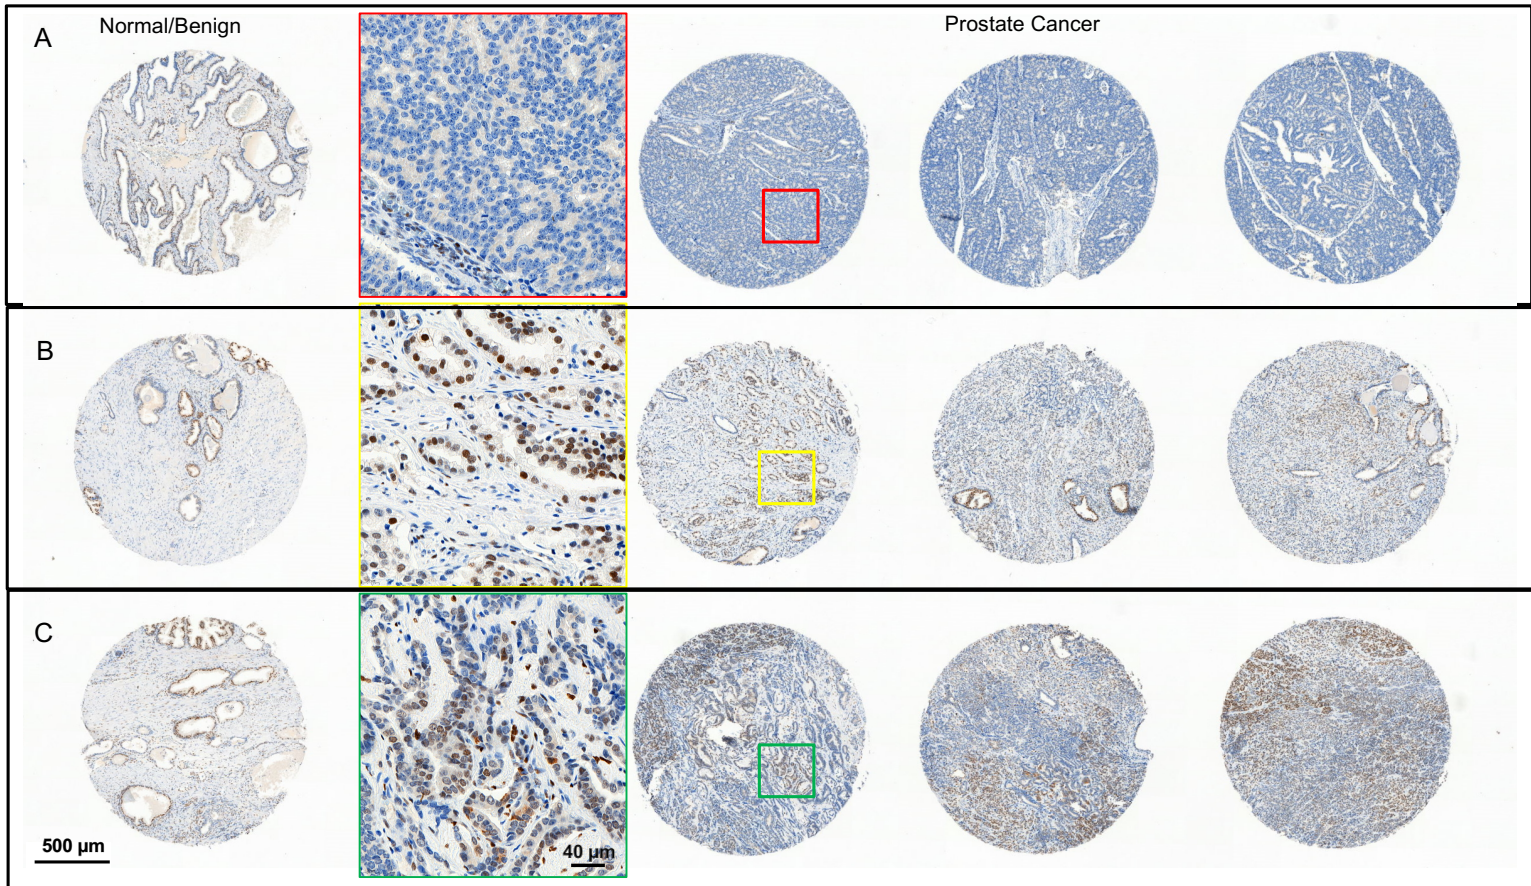

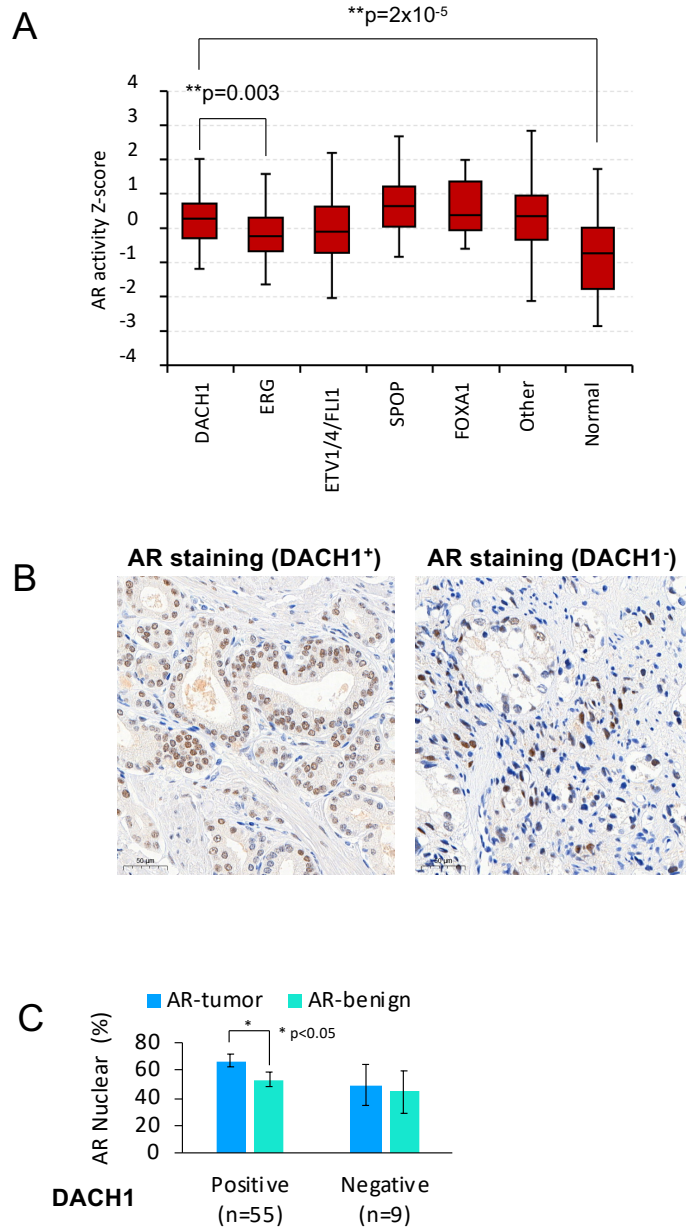

**A**

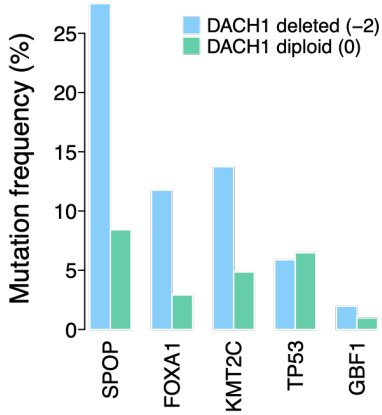

| DACH1 SCNA | -2  | -1  | 0   | 1 | 2 | Sum |
|------------|-----|-----|-----|---|---|-----|
| Samples    | 51  | 126 | 309 | 4 | 2 | 492 |
|            | Del |     | Dip |   |   |     |

|       | DACH1 Del (n=51) | DACH1 diploid (n=309) | p val Fisher test | p.adj (Bonf) |
|-------|------------------|-----------------------|-------------------|--------------|
| SPOP  | 14               | 26                    | 0.0023            | 0.012        |
| FOXA1 | 6                | 9                     | 0.0158            | 0.079        |
| KMT2C | 7                | 15                    | 0.0583            | 0.29         |
| TP53  | 3                | 20                    | 1.0               | 1.0          |
| GBF1  | 1                | 3                     | 0.4617            | 1.0          |

**B**

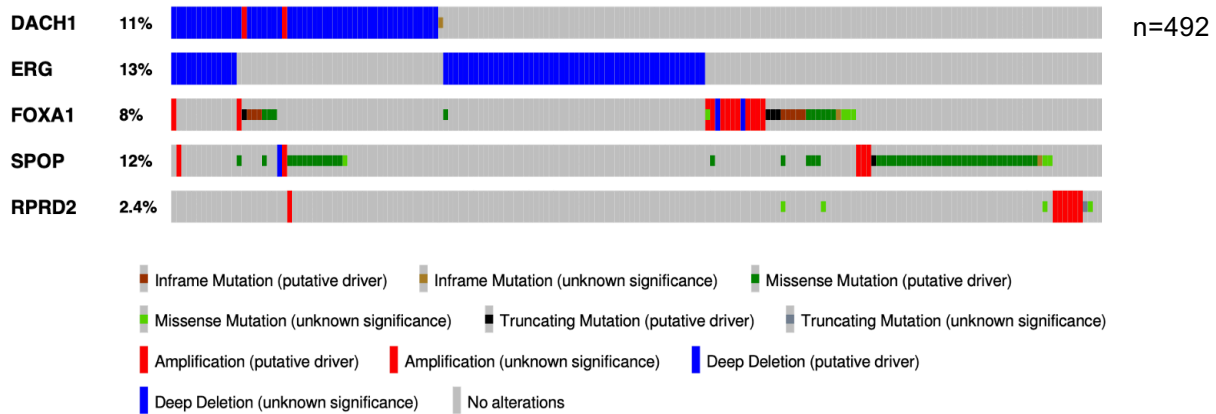

**C**

| A     | B     | Neither | A Not B | B Not A | Both | Log2 Odds Ratio | p-Value | q-Value | Tendency           |
|-------|-------|---------|---------|---------|------|-----------------|---------|---------|--------------------|
| DACH1 | ERG   | 386     | 41      | 52      | 13   | 1.235           | 0.015   | 0.051   | Co-occurrence      |
|       | FOXA1 | 407     | 45      | 31      | 9    | 1.393           | 0.022   | 0.054   | Co-occurrence      |
|       | SPOP  | 394     | 37      | 44      | 17   | 2.041           | <0.001  | <0.001  | Co-occurrence      |
|       | RPRD2 | 427     | 53      | 11      | 1    | -0.449          | 0.613   | 0.613   | Mutual exclusivity |
| ERG   | FOXA1 | 389     | 63      | 38      | 2    | -1.622          | 0.078   | 0.156   | Mutual exclusivity |
|       | SPOP  | 367     | 64      | 60      | 1    | <-3             | 0.001   | 0.006   | Mutual exclusivity |
| FOXA1 | RPRD2 | 415     | 65      | 12      | 0    | <-3             | 0.179   | 0.256   | Mutual exclusivity |
|       | SPOP  | 398     | 33      | 54      | 7    | 0.645           | 0.214   | 0.267   | Co-occurrence      |
| SPOP  | RPRD2 | 442     | 38      | 10      | 2    | 1.218           | 0.254   | 0.282   | Co-occurrence      |
| RPRD2 | SPOP  | 422     | 58      | 9       | 3    | 1.278           | 0.177   | 0.256   | Co-occurrence      |

**D**

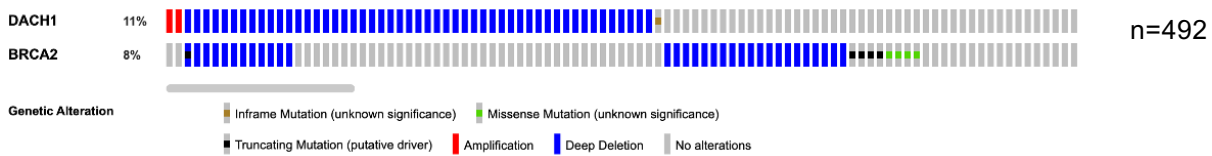

| A     | B     | Neither | A Not B | B Not A | Both | Log2 Odds Ratio | p-Value | q-Value | Tendency      |
|-------|-------|---------|---------|---------|------|-----------------|---------|---------|---------------|
| DACH1 | BRCA2 | 410     | 42      | 28      | 12   | 2.065           | <0.001  | 0.007   | Co-occurrence |



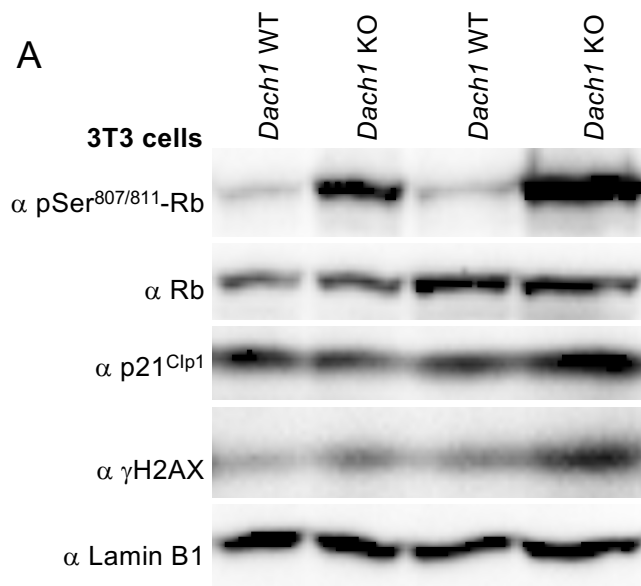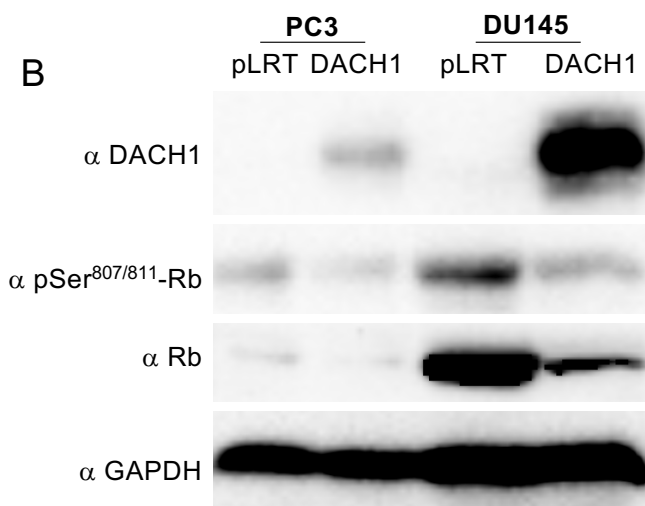



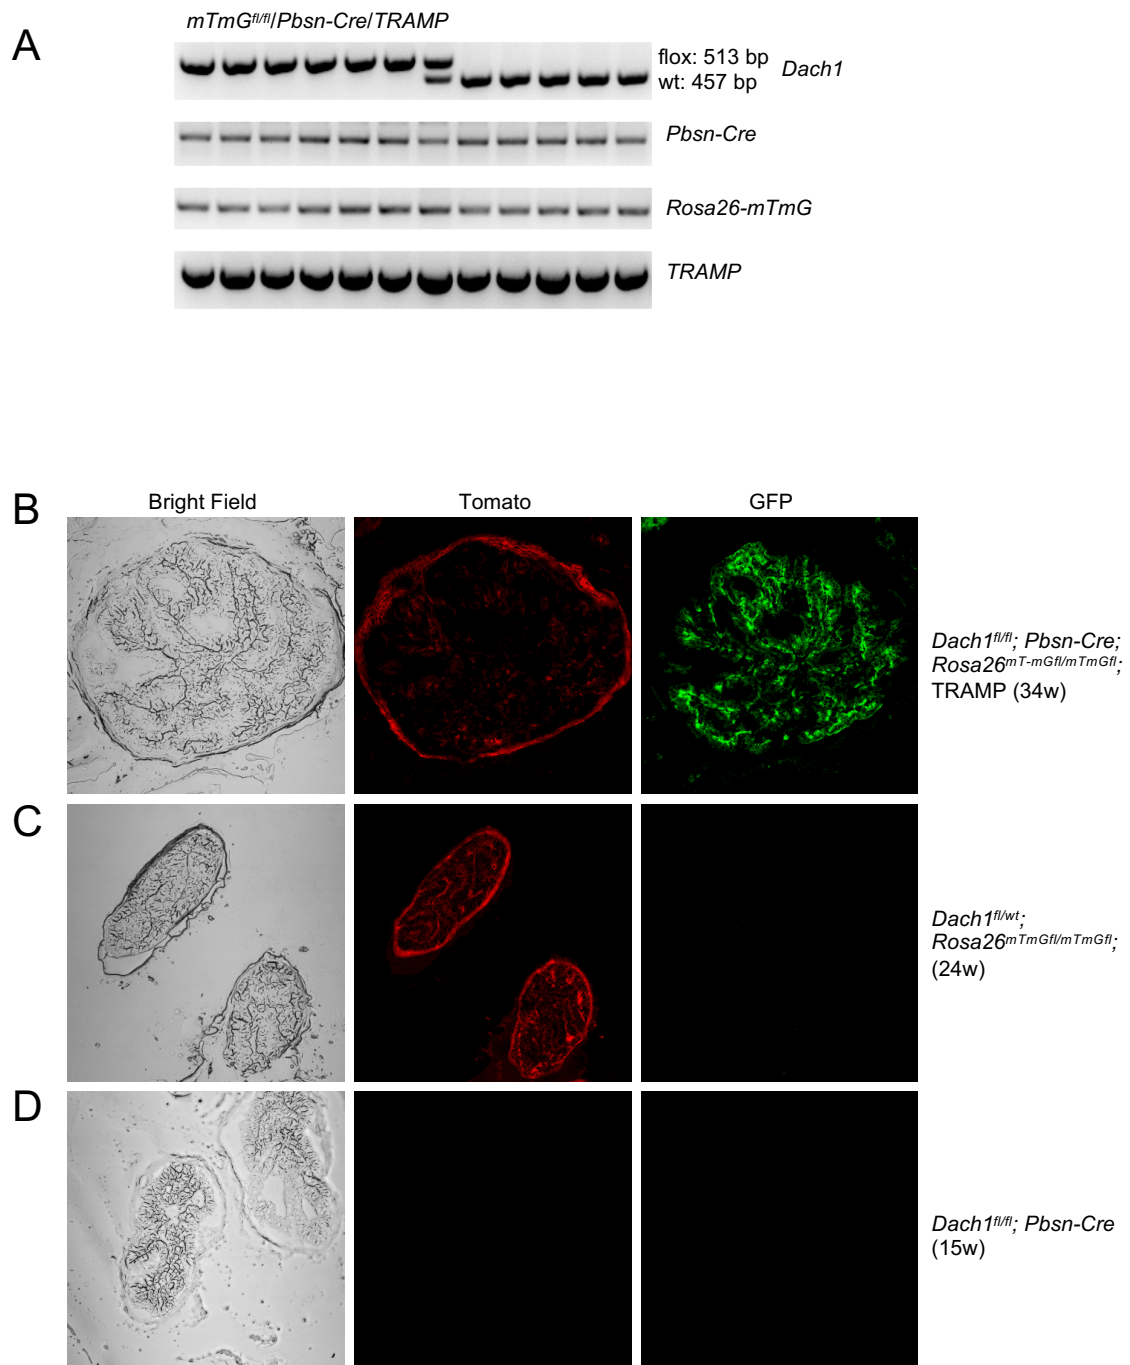

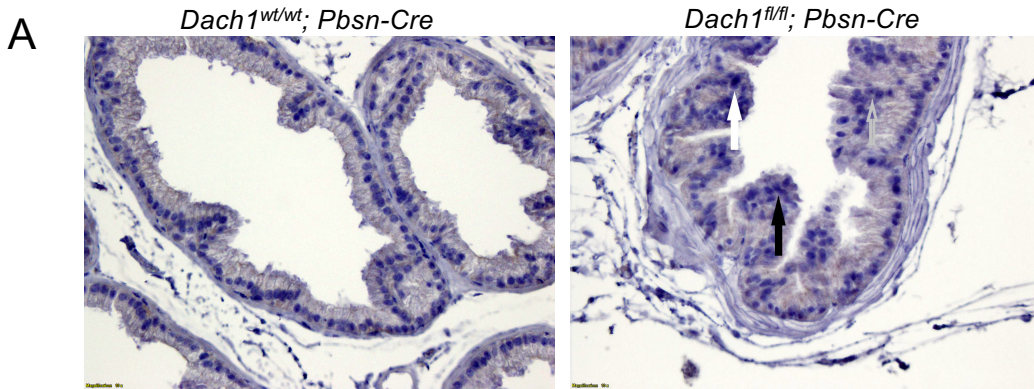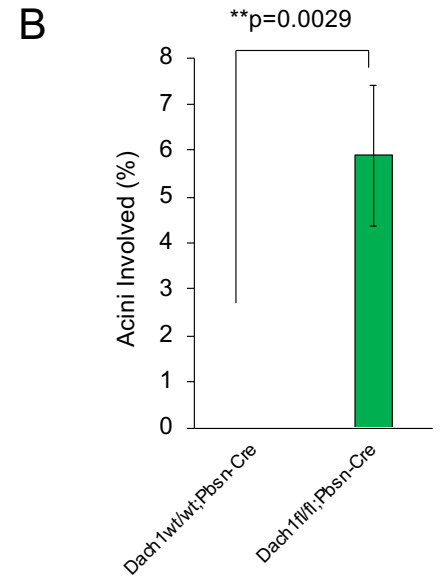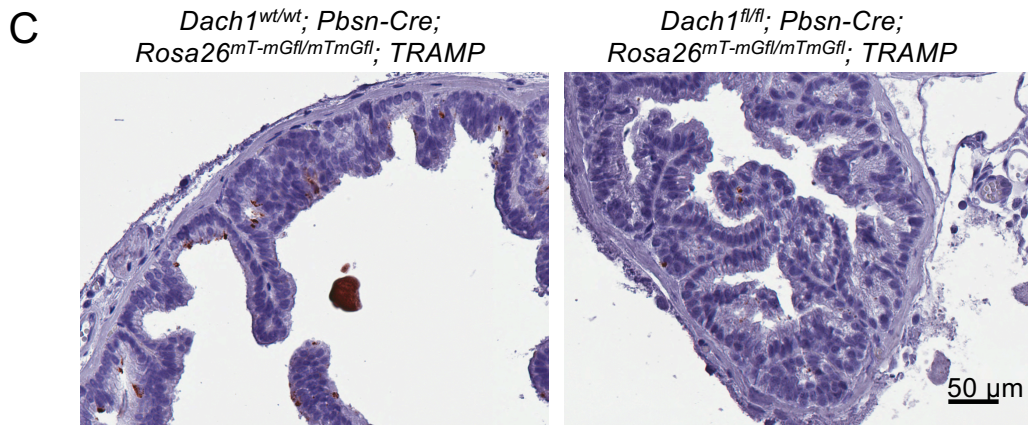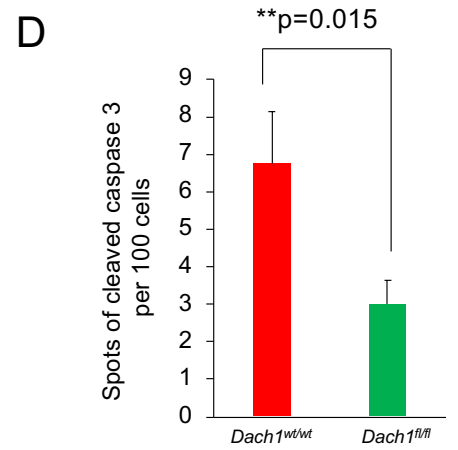

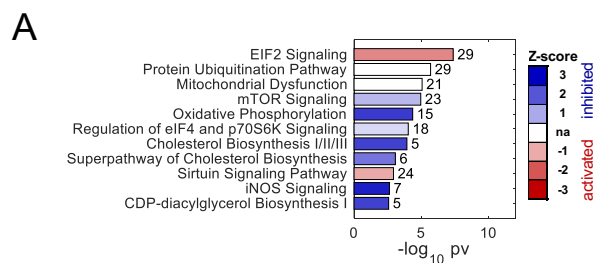

**B**

| Canonical Pathway                                          | <i>p</i> | WT/KO Z | N  |
|------------------------------------------------------------|----------|---------|----|
| EIF2 Signaling                                             | 4.27E-08 | 1.41    | 29 |
| Protein Ubiquitination Pathway                             | 2.04E-06 | NaN     | 29 |
| Mitochondrial Dysfunction                                  | 8.71E-06 | NaN     | 21 |
| mTOR Signaling                                             | 1.1E-05  | -0.83   | 23 |
| Oxidative Phosphorylation                                  | 4.37E-05 | -2.32   | 15 |
| Regulation of eIF4 and p70S6K Signaling                    | 9.33E-05 | -0.45   | 18 |
| Cholesterol Biosynthesis I                                 | 0.000117 | -2.24   | 5  |
| Cholesterol Biosynthesis II (via 24,25-dihydrocholesterol) | 0.000117 | -2.24   | 5  |
| Cholesterol Biosynthesis III (via Desmosterol)             | 0.000117 | -2.24   | 5  |
| Superpathway of Cholesterol Biosynthesis                   | 0.000851 | -1.63   | 6  |
| Sirtuin Signaling Pathway                                  | 0.001175 | 1       | 24 |
| iNOS Signaling                                             | 0.002344 | -2.65   | 7  |
| CDP-diacylglycerol Biosynthesis I                          | 0.002692 | -2.24   | 5  |

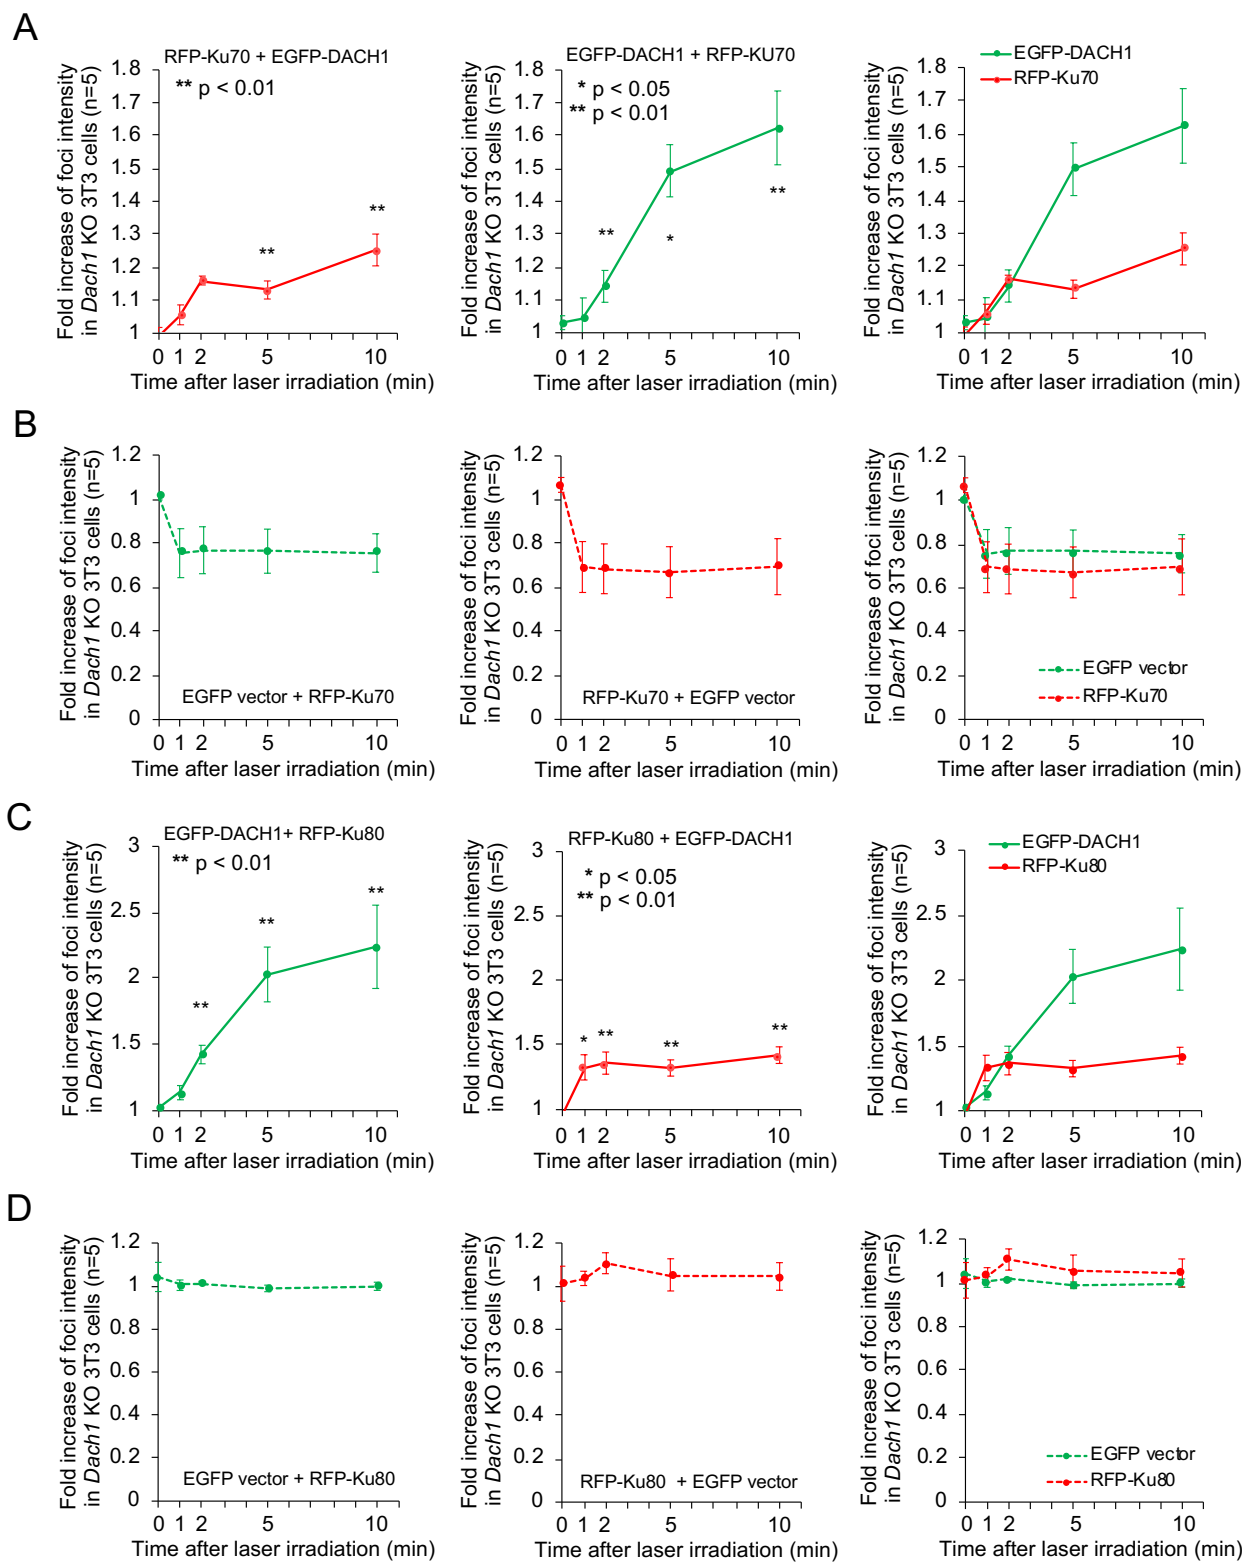

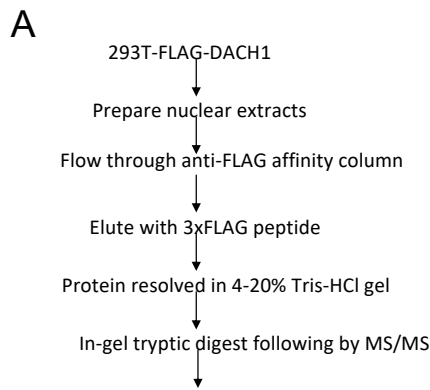

|    |    |                                                                                                      |
|----|----|------------------------------------------------------------------------------------------------------|
| 11 | C2 | ATP-dependent DNA helicase 2 subunit 2 (EC 3.6.1.-) (ATP-dependent DNA helicase II 80 kDa subunit)   |
| 15 | G2 | ATP-dependent DNA helicase 2 subunit 1 (ATP-dependent DNA helicase II 70 kDa subunit) (Lupus Ku aut) |

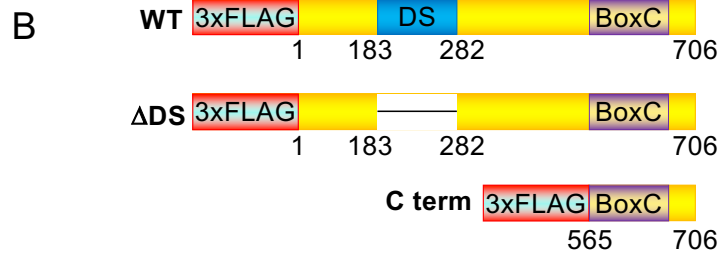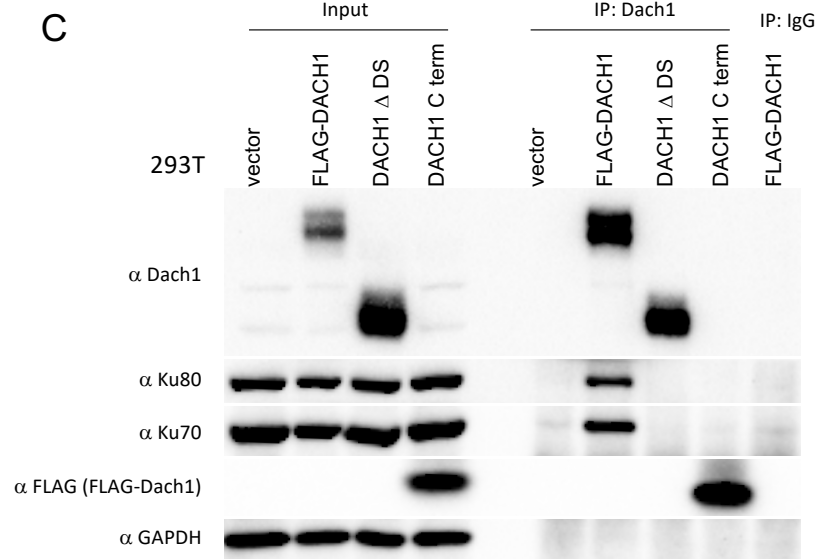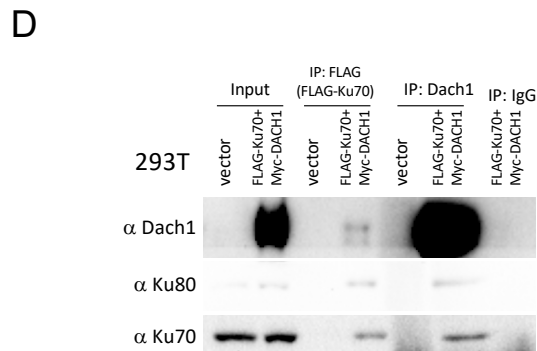

**E**

| Kinase Predictor V2 Score | Human Kinase Short Name | Human UniProt. ID | Kinase Predictor V2 Score - Proximity |
|---------------------------|-------------------------|-------------------|---------------------------------------|
| 639                       | ERK1                    | P27361            | 1440                                  |
| 629                       | ERK2 (MAPK1)            | P28482            | 1439                                  |
| 596                       | JNK1 (MAPK8)            | P45983            | 1367                                  |
| 596                       | JNK3 (MAPK10)           | P53779            | 1367                                  |
| 594                       | ERK5 (MAPK7)            | Q13164            | 1347                                  |
| 590                       | p38g MAPK (MAPK1)       | P53778            | 1337                                  |
| 580                       | CDK2                    | P24941            | 1327                                  |
| 578                       | p38a MAPK (MAPK1)       | Q16539            | 1326                                  |
| 578                       | CDK1 (CDC2)             | P06493            | 1319                                  |
| 575                       | JNK2 (MAPK9)            | P45984            | 1316                                  |
| 575                       | p38d MAPK (MAPK1)       | Q15264            | 1313                                  |
| 561                       | CDKL5 (STK9)            | Q76039            | 1299                                  |
| 557                       | CDK3                    | Q00526            | 1284                                  |
| 552                       | p38b MAPK (MAPK1)       | Q15759            | 1278                                  |

A

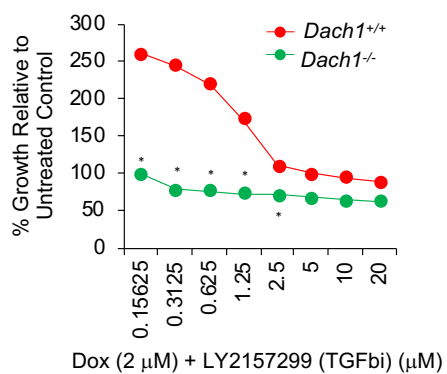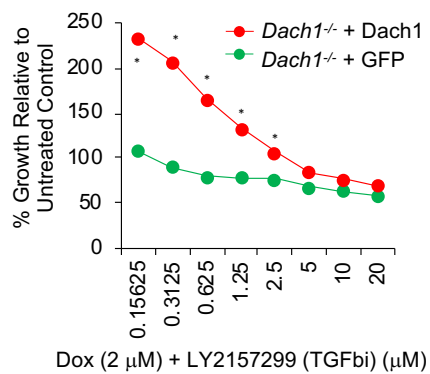

B

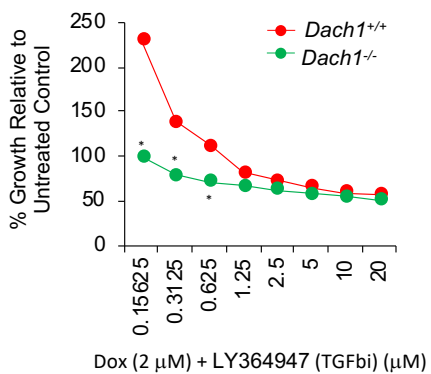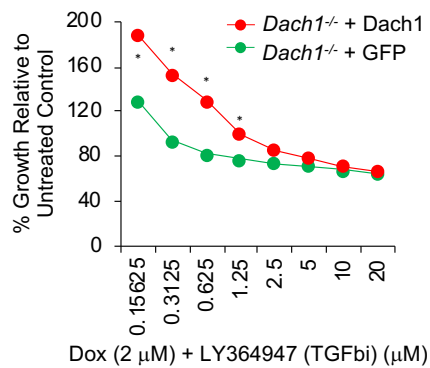

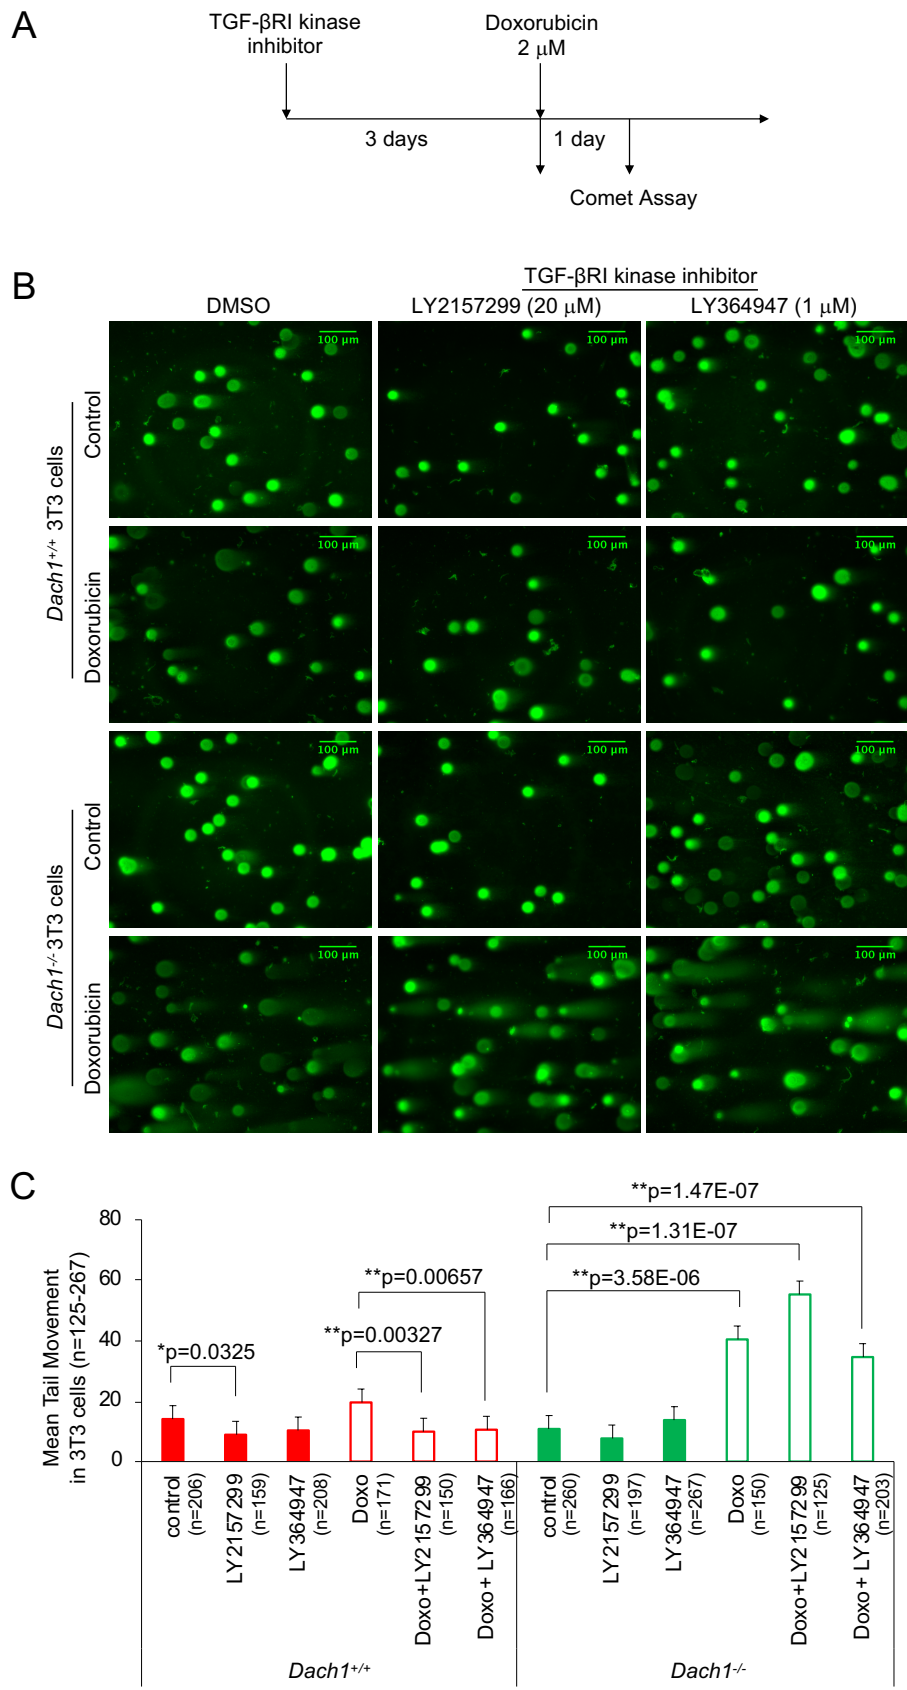

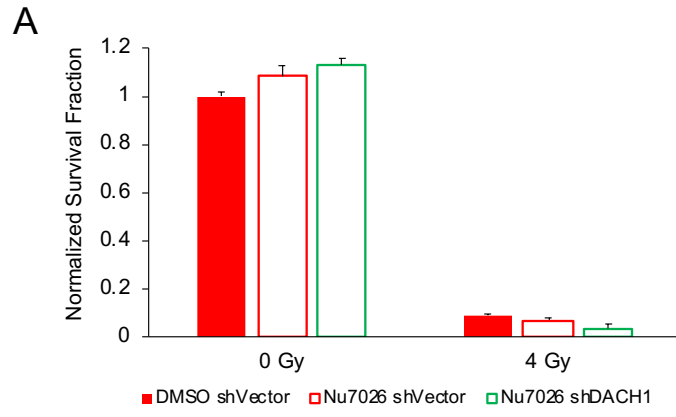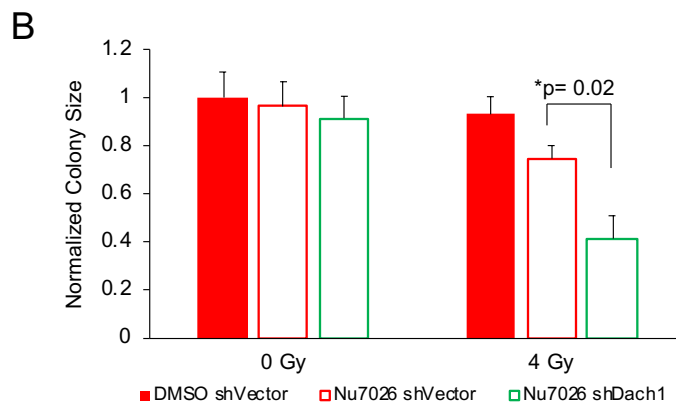

Supplement: 41388_2023_2668_MOESM1_ESM.pdf [file 41388_2023_2668_MOESM1_ESM.pdf]
